# Supplementary material
Source: PubMed Central journal article supplement (PMC3963566)
Supplement: supp_tpc.113.118687_tpc118687Supplemental.pdf [file supp_tpc.113.118687_tpc118687Supplemental.pdf]

Supplemental Figures

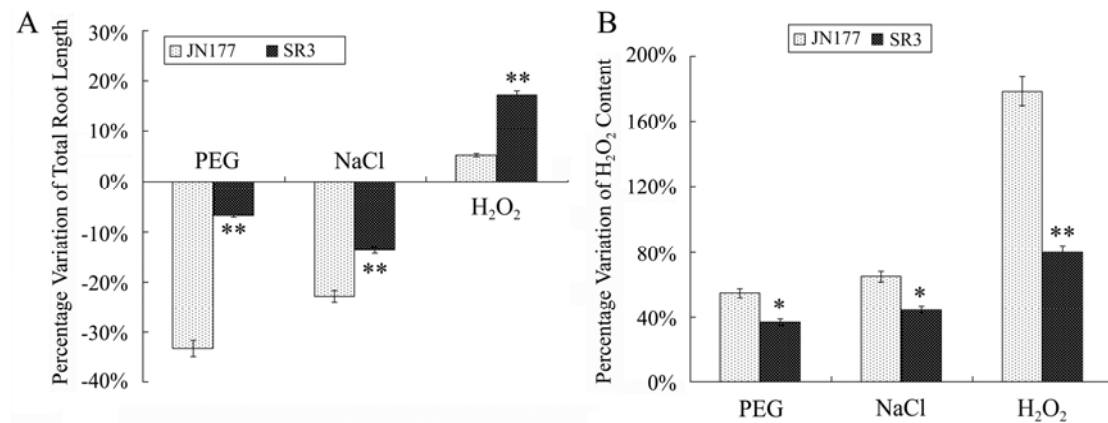

**Supplemental Figure 1.** Variation of total root length and root H<sub>2</sub>O<sub>2</sub> content in SR3 under stress conditions.

(A) and (B) Percentage variation of total root length (A) and root H<sub>2</sub>O<sub>2</sub> content (B) in one-week old SR3 and JN177 exposed to 18% PEG, 200 mM NaCl or 200 mM H<sub>2</sub>O<sub>2</sub>. Non-stressed or stressed seedlings were grown for two weeks. All data are given as mean  $\pm$  s.d. The asterisks and double asterisks represent significant difference determined by Student's *t*-test at  $P < 0.05$  and  $P < 0.01$ , respectively.  $n=60$ .



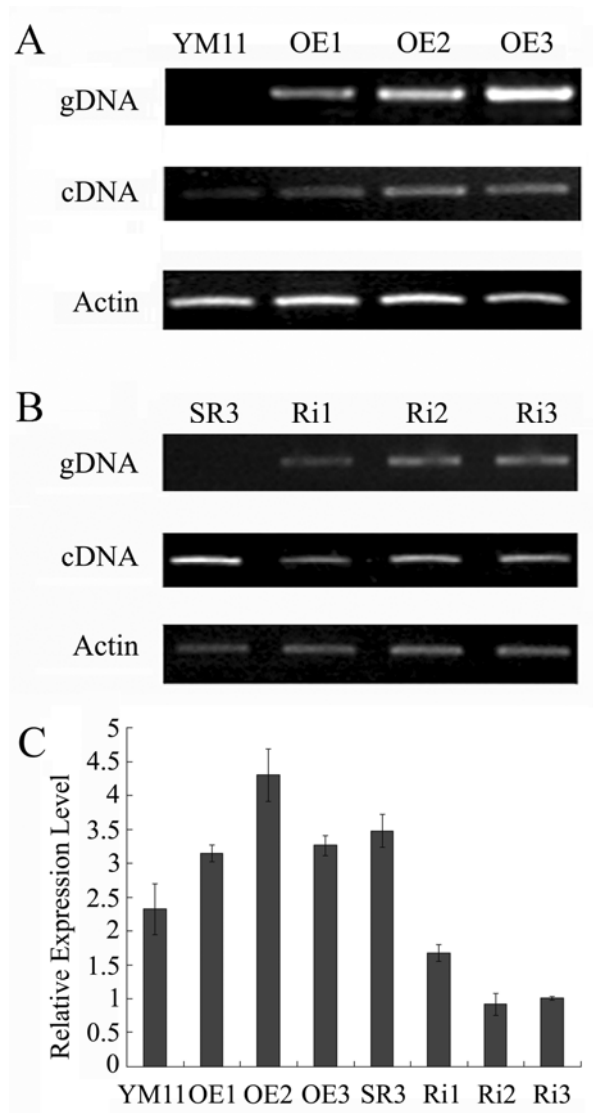

**Supplemental Figure 3.** PCR test of transgenic wheat plants.

(A) PCR test of transgenic wheat plants constitutively expressing *sro1*. The upper panel, *sro1* insertion into YM11 revealed by PCR in YM11, *sro1* OE1, *sro1* OE2 and *sro1* OE3 transgenic plants; the middle and lower panel, transcript levels of *sro1* revealed by RT-PCR.

(B) PCR test of transgenic wheat plants repressing *sro1*. The upper panel, the insertion of *sro1*-RNAi fragment into SR3 revealed by PCR in SR3, Ri (RNAi) 1, Ri2 and Ri3 transgenic plants; the middle and lower panel, transcript levels of *sro1* revealed by RT-PCR.

(C) Quantitative RT-PCR test of transgenic wheat plants constitutively expressing or repressing *sro1*. Transcript levels relative to Ta-*Actin* are presented for each sample. All data are given as mean  $\pm$  s.d. of three independent biological replicates.

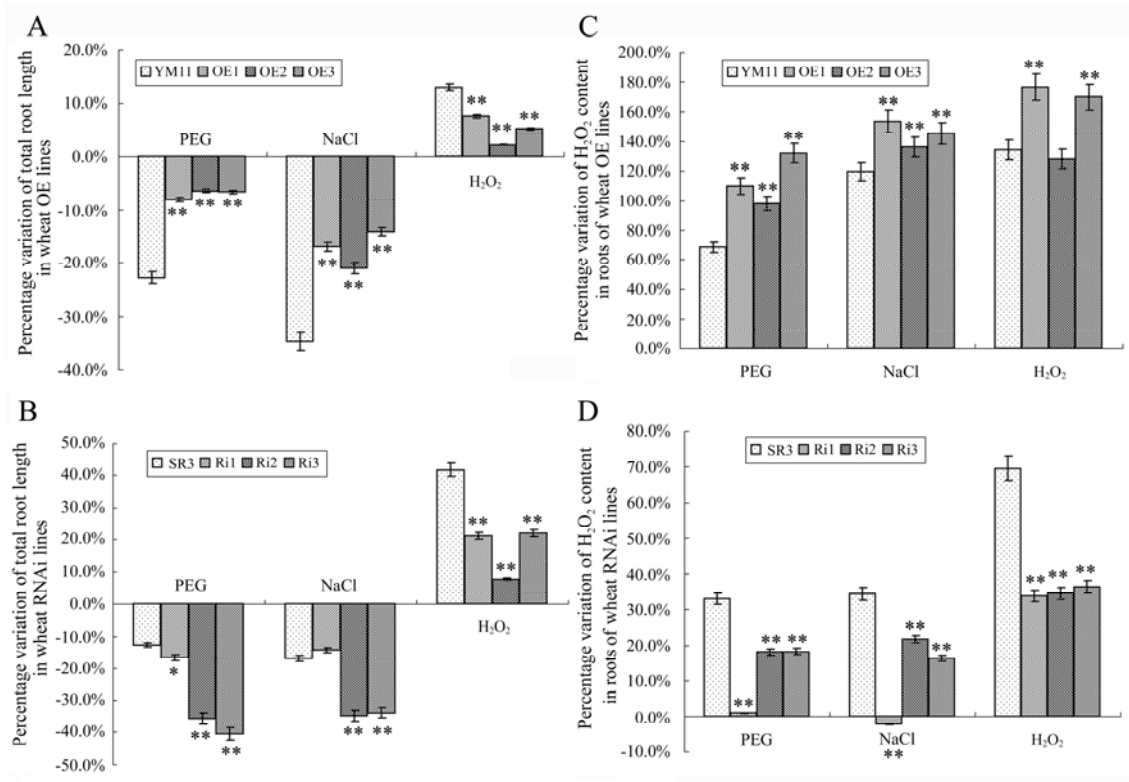

**Supplemental Figure 4.** Variation of total root length and root H<sub>2</sub>O<sub>2</sub> content in transgenic wheat lines under stress conditions.

(A) and (B) Percentage variation of total root length in one-week-old *sro1* overexpression (OE) wheat lines (A) and *sro1* RNAi (Ri) lines (B) exposed to 18% PEG, 200 mM NaCl or 200 mM H<sub>2</sub>O<sub>2</sub>.

(C) and (D) Percentage variation of H<sub>2</sub>O<sub>2</sub> content in the roots of one-week-old wheat OE lines (C) and Ri lines (D) exposed to 18% PEG, 200 mM NaCl or 200 mM H<sub>2</sub>O<sub>2</sub>. Non-stressed or stressed seedlings grown for two weeks. All data are given as mean  $\pm$  s.d. The asterisks and double asterisks represent significant difference determined by the Student's *t*-test at  $P < 0.05$  and  $P < 0.01$ , respectively. n=15.

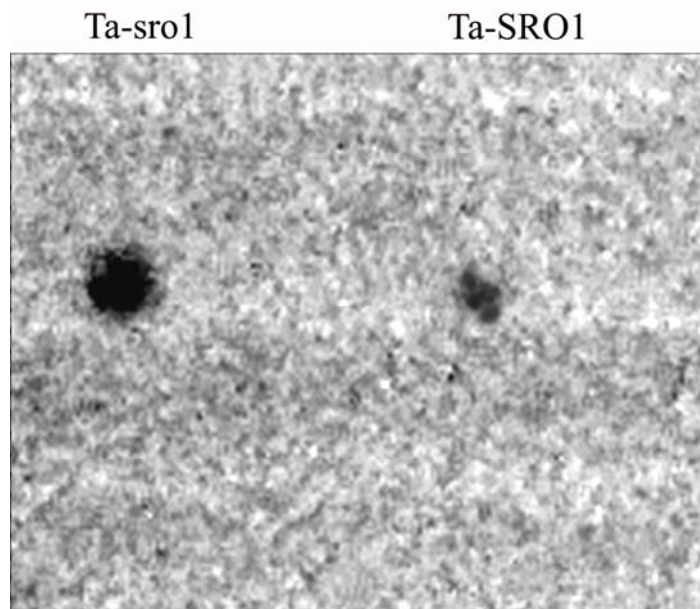

**Supplemental Figure 5.** *In vitro* DNA binding activity of Ta-sro1-His<sub>6</sub> and Ta-SRO1-His<sub>6</sub> proteins. 1 µg of purified Ta-sro1-His<sub>6</sub> and Ta-SRO1-His<sub>6</sub> protein was used for dot blotting. 10 µg/mL biotinylated calf thymus DNA was used as probe in this assay.

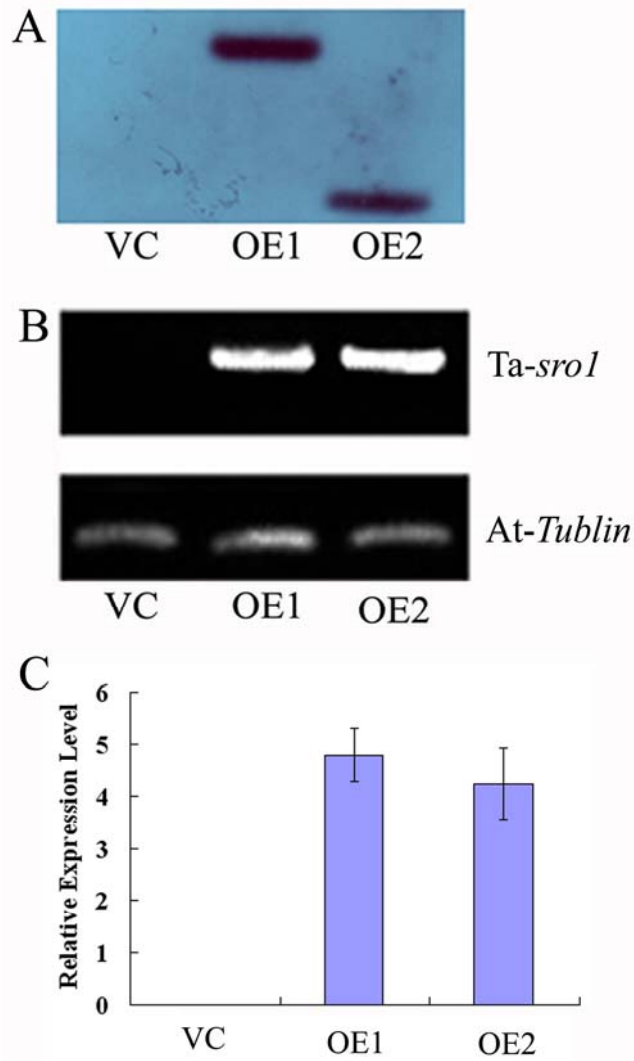

**Supplemental Figure 6.** Transgenic test of the constitutive expression of *Ta-sro1* in wild-type *A. thaliana*.

**(A)** *Ta-sro1* insertion into Col-0 revealed by Southern blot in vector control (VC), *Ta-sro1* OE1 and *Ta-sro1* OE2 transgenic plants.

**(B)** Transcript levels of *Ta-sro1* revealed by RT-PCR.

**(C)** Transcript levels of *Ta-sro1* revealed by quantitative RT-PCR. Transcript levels relative to *At-Tublin* are presented for each sample. The data are given as mean  $\pm$  s.d. of three independent biological replicates.

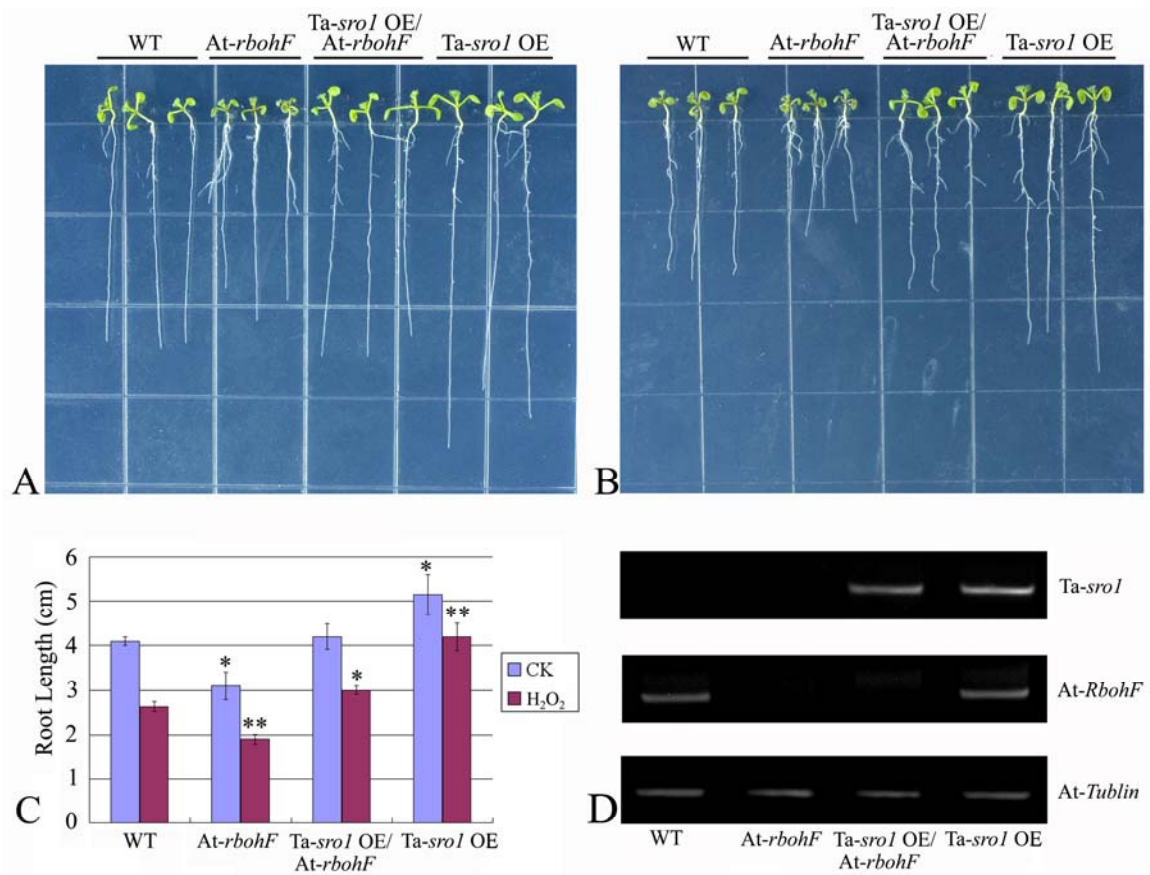

**Supplemental Figure 7.** Over-expression of *Ta-sro1* in the *At-rbohF* mutant background promoted the oxidative stress tolerance of the mutant.

(A) and (B) Phenotype of ten-day-old wild type, *At-rbohF* mutant, *Ta-sro1* OE lines and *At-rbohF* /*Pro35S:Ta-sro1* transgenic lines under control (A) and 0.6 mM H<sub>2</sub>O<sub>2</sub> (B) for 5 days.

(C) Quantitative measurement of total root length in *At-rbohF* mutant, *Ta-sro1* OE and *At-rbohF* /*Pro35S:Ta-sro1* transgenic lines under control (A) and 0.6 mM H<sub>2</sub>O<sub>2</sub> (B).

(D) Expression levels of *Ta-sro1* and *At-RbohF* in the above seedlings revealed by RT-PCR. All data are given as mean  $\pm$  s.d. of three independent experiments. The asterisks and double asterisks represent significant difference determined by Student's *t*-test at  $P < 0.05$  and  $P < 0.01$ , respectively.

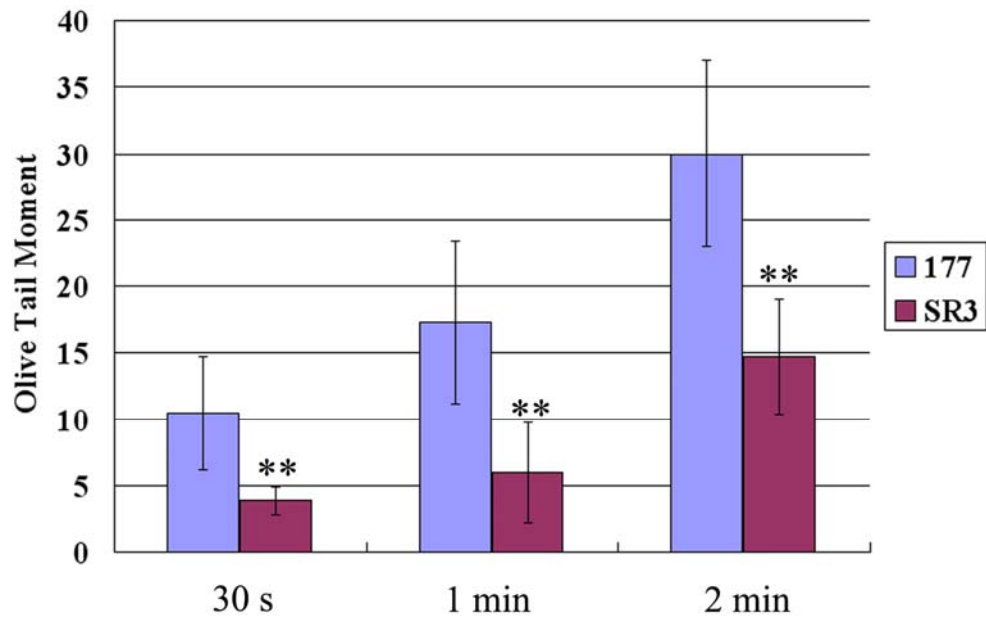

**Supplemental Figure 8.** Single cell gel electrophoresis (SCGE) analysis of the protoplasts of JN177 and SR3 exposed to UV treatment.

DNA damage in protoplasts of JN177 and SR3 exposed to UV for 30 s, 1 min and 2 min. Olive tail moment (OTM) represents the product of the percentage of total DNA in the tail (TD) and the tail length (TL), measured from the centre of the nucleus towards the end of the tail ( $OTM = TL \times TD$ ). All data are given as mean  $\pm$  s.d. of three independent experiments. The double asterisks represent significant difference determined by the Student's *t*-test at  $P < 0.01$ .



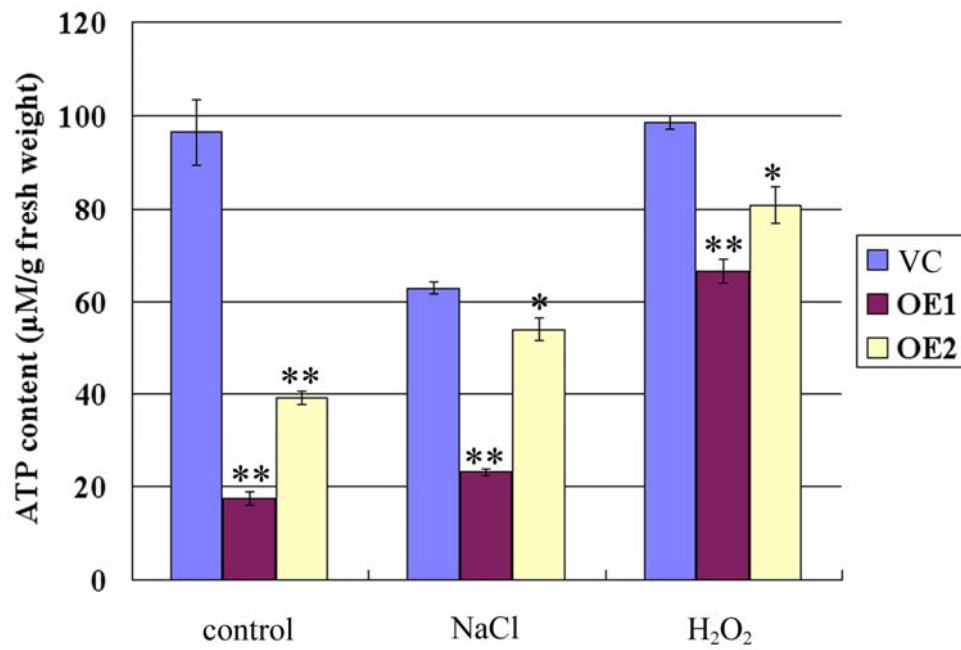

**Supplemental Figure 9.** The ATP content between vector control (VC) and *Ta-sro1* overexpression (OE) *A. thaliana* lines under normal and stress conditions.

All data are given as mean  $\pm$  s.d. of three independent experiments. The asterisks and double asterisks represent significant difference determined by Student's *t*-test at  $P < 0.05$  and  $P < 0.01$ , respectively.

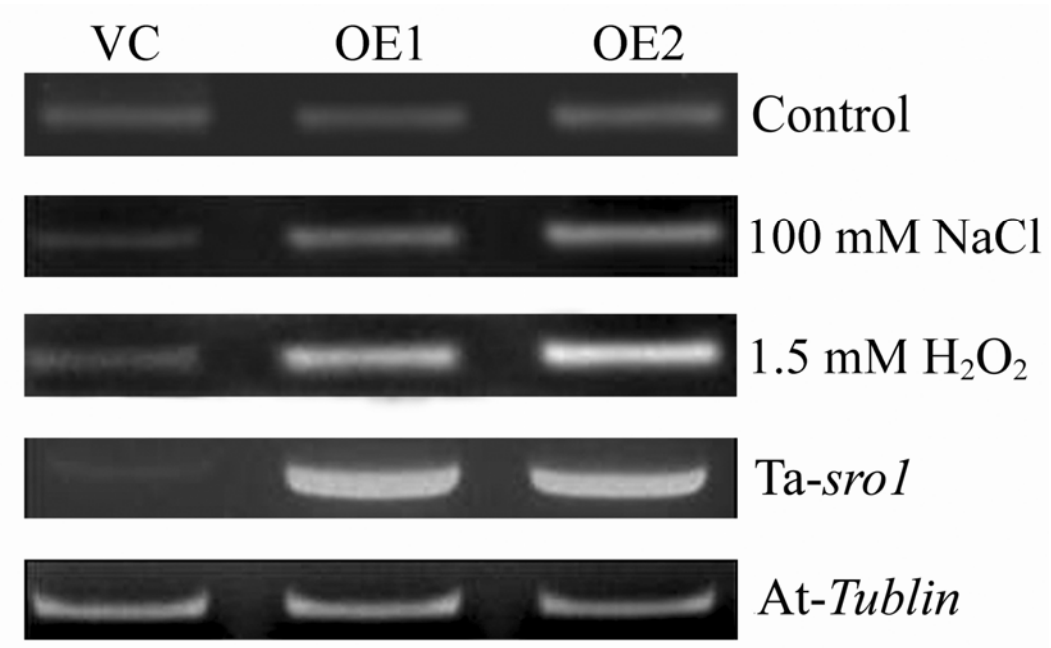

**Supplemental Figure 10.** Expression of *At-ATM* in vector control (VC) and *Ta-sro1* overexpression (OE) *A. thaliana* lines. Control, no stress imposed to the plants.

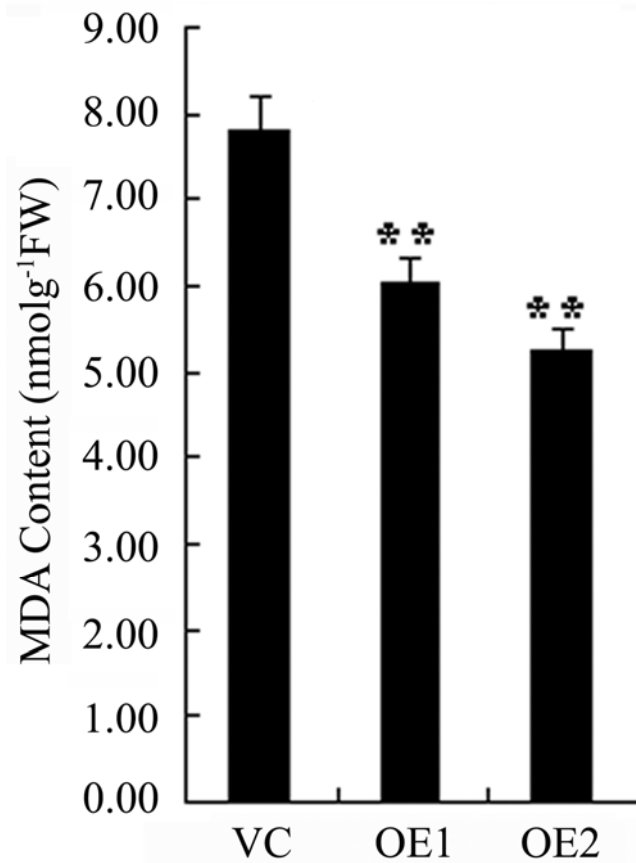

**Supplemental Figure 11.** The malondialdehyde (MDA) content of vector control (VC) and Ta-sro1 overexpression (OE) *A. thaliana* lines under salinity stress.

All data are given as mean  $\pm$  s.d. of three independent experiments. The double asterisks represent significant differences determined by Student's *t*-test at  $P < 0.01$ .

**Supplemental Table 1** Oxidative stress related-genes showing at least a two-fold induction or repression upon exposure to abiotic stress.

| Probe ID | Target ID    | Discription                                            | Seq Description                          |
|----------|--------------|--------------------------------------------------------|------------------------------------------|
| ta_02235 | lcl TC236720 | peroxidase, putative                                   | peroxidase                               |
| ta_02525 | lcl TC237832 | ozone-responsive stress-related protein, putative      | ozone-responsive stress-related          |
| ta_02691 | lcl TC238667 | XPB1 (ARABIDOPSIS HOMOLOG OF XERODERMA                 | DNA repair and transcription factor xpb1 |
| ta_02748 | lcl TC238988 | peroxidase 30 (PER30) (P30) (PRXR9)                    | peroxidase                               |
| ta_02919 | lcl TC240399 | ozone-responsive stress-related protein, putative      | ozone-responsive stress-related          |
| ta_02981 | lcl TC240853 | RCI3 (RARE COLD INDUCIBLE GENE 3)                      | peroxidase 1                             |
| ta_03206 | lcl TC243256 | peroxidase, putative                                   | peroxidase 53, expressed                 |
| ta_03386 | lcl TC246747 | ATGPX6 (GLUTATHIONE PEROXIDASE                         | glutathione peroxidase                   |
| ta_03572 | lcl TC247144 | ATGPX6 (GLUTATHIONE PEROXIDASE                         | glutathione peroxidase                   |
| ta_03790 | lcl TC247784 | ATGPX6 (GLUTATHIONE PEROXIDASE                         | glutathione peroxidase                   |
| ta_03938 | lcl TC248113 | peroxidase, putative                                   | peroxidase                               |
| ta_03985 | lcl TC248249 | peroxidase, putative                                   | bacterial-induced peroxidase precursor   |
| ta_04167 | lcl TC248823 | ATGPX6 (GLUTATHIONE PEROXIDASE                         | glutathione peroxidase                   |
| ta_04333 | lcl TC249202 | peroxidase 12 (PER12) (P12) (PRXR6)                    | anionic peroxidase                       |
| ta_04364 | lcl TC249268 | peroxidase 12 (PER12) (P12) (PRXR6)                    | anionic peroxidase                       |
| ta_04486 | lcl TC249534 | peroxidase, putative                                   | peroxidase 53, expressed                 |
| ta_04506 | lcl TC249588 | anionic peroxidase, putative                           | peroxidase family, expressed             |
| ta_04511 | lcl TC249601 | peroxidase, putative                                   | peroxidase 52, expressed                 |
| ta_04527 | lcl TC249624 | peroxidase 22 (PER22) (P22) (PRXEA) / basic peroxidase | peroxidase                               |
| ta_04529 | lcl TC249631 | RCI3 (RARE COLD INDUCIBLE GENE 3)                      | peroxidase family, expressed             |
| ta_04543 | lcl TC249670 | EMB2171 (EMBRYO DEFECTIVE 2171); structural            | 60s ribosomal protein l23                |
| ta_04549 | lcl TC249692 | RCI3 (RARE COLD INDUCIBLE GENE 3)                      | peroxidase precursor                     |
| ta_04552 | lcl TC249701 | peroxidase, putative                                   | peroxidase family, expressed             |
| ta_04975 | lcl TC250316 | peroxidase, putative                                   | root peroxidase                          |
| ta_04979 | lcl TC250320 | peroxidase, putative                                   | peroxidase                               |
| ta_04980 | lcl TC250321 | peroxidase 30 (PER30) (P30) (PRXR9)                    | peroxidase 1 precursor                   |
| ta_04981 | lcl TC250322 | peroxidase, putative                                   | peroxidase 72 precursor                  |
| ta_04982 | lcl TC250324 | RCI3 (RARE COLD INDUCIBLE GENE 3)                      | peroxidase 1 precursor                   |
| ta_04983 | lcl TC250325 | RCI3 (RARE COLD INDUCIBLE GENE 3)                      | peroxidase 1 precursor                   |
| ta_04985 | lcl TC250327 | peroxidase 72 (PER72) (P72) (PRXR8)                    | peroxidase 72 precursor                  |
| ta_04990 | lcl TC250334 | RCI3 (RARE COLD INDUCIBLE GENE 3)                      | peroxidase 1 precursor                   |
| ta_04992 | lcl TC250338 | peroxidase, putative                                   | root peroxidase                          |
| ta_04994 | lcl TC250340 | RCI3 (RARE COLD INDUCIBLE GENE 3)                      | peroxidase 1 precursor                   |
| ta_04996 | lcl TC250345 | peroxidase 30 (PER30) (P30) (PRXR9)                    | peroxidase                               |
| ta_06216 | lcl TC252860 | RBOHD (RESPIRATORY BURST OXIDASE PROTEIN               | nadph oxidase                            |
| ta_06566 | lcl TC253673 | RBOHD (RESPIRATORY BURST OXIDASE PROTEIN               | respiratory burst oxidase protein b      |
| ta_07255 | lcl TC255712 | peroxidase 27 (PER27) (P27) (PRXR7)                    | peroxidase family, expressed             |
|          |              | ATRBOHB (RESPIRATORY BURST OXIDASE                     |                                          |
| ta_07319 | lcl TC255976 | HOMOLOG B)                                             | respiratory burst oxidase protein b      |
| ta_07444 | lcl TC256406 | peroxidase, putative                                   | peroxidase                               |

|          |              |                                                                     |                                                                        |
|----------|--------------|---------------------------------------------------------------------|------------------------------------------------------------------------|
| ta_07513 | lcl TC256670 | peroxidase, putative                                                | peroxidase 49 precursor                                                |
| ta_07972 | lcl TC258661 | peroxidase, putative                                                | peroxidase family, expressed                                           |
| ta_08118 | lcl TC259505 | cationic peroxidase, putative                                       | peroxidase 43, expressed                                               |
| ta_08164 | lcl TC259922 | RCI3 (RARE COLD INDUCIBLE GENE 3);                                  | peroxidase 1 precursor                                                 |
| ta_08213 | lcl TC260407 | peroxidase 12 (PER12) (P12) (PRXR6)                                 | peroxidase 1                                                           |
| ta_08389 | lcl TC261867 | anionic peroxidase, putative                                        | peroxidase family, expressed                                           |
| ta_08661 | lcl TC262975 | peroxidase, putative                                                | cationic peroxidase isozyme 40k precursor                              |
| ta_08667 | lcl TC262983 | APX1 (ASCORBATE PEROXIDASE 1)<br>ATGPX1 (GLUTATHIONE PEROXIDASE 1); | ascorbate peroxidase                                                   |
| ta_09233 | lcl TC264120 | glutathione<br>ATGPX7 (GLUTATHIONE PEROXIDASE 7);                   | glutathione peroxidase                                                 |
| ta_09247 | lcl TC264139 | glutathione                                                         | glutathione peroxidase                                                 |
| ta_09737 | lcl TC264894 | peroxidase, putative                                                | peroxidase 1 precursor                                                 |
| ta_09739 | lcl TC264896 | peroxidase, putative                                                | peroxidase 1 precursor                                                 |
| ta_10334 | lcl TC266138 | SAPX                                                                | stromal ascorbate peroxidase                                           |
| ta_10670 | lcl TC266948 | peroxidase, putative                                                | tpa: class iii peroxidase 65 precursor                                 |
| ta_10713 | lcl TC267045 | peroxidase, putative                                                | peroxidase familyexpressed                                             |
| ta_10714 | lcl TC267046 | anionic peroxidase, putative                                        | peroxidase family, expressed                                           |
| ta_10865 | lcl TC267426 | peroxidase, putative                                                | peroxidase                                                             |
| ta_10866 | lcl TC267427 | peroxidase, putative                                                | peroxidase                                                             |
| ta_11263 | lcl TC268590 | ALPHA-DOX1 (ALPHA-DIOXYGENASE 1)                                    | feebly-like protein                                                    |
| ta_11519 | lcl TC269272 | peroxidase 27 (PER27) (P27) (PRXR7)                                 | peroxidase 1 precursor                                                 |
| ta_12269 | lcl TC272108 | RCI3 (RARE COLD INDUCIBLE GENE 3)                                   | peroxidase 1 precursor                                                 |
| ta_12455 | lcl TC273129 | peroxidase, putative                                                | peroxidase 1 precursor                                                 |
| ta_13839 | WL604        | peroxidase, putative                                                | peroxidase 52, expressed                                               |
| ta_13986 | WL751        | peroxidase, putative                                                | peroxidase                                                             |
| ta_10067 | lcl TC265505 | RCD1 (RADICAL-INDUCED CELL DEATH1)                                  | poly (ADP ribose) polymerase catalytic domain<br>containing, expressed |

Note: The red color indicated the abiotic stress induced genes homologous with *At-RCD1*

**Supplemental Table 2.** Model evaluations and templates (PDB codes) used for modeling.

|            | Ta-SRO1   | Ta-sro1   | At-RCD1    | At-PARP1         | At-PARP2   |
|------------|-----------|-----------|------------|------------------|------------|
| ProQ_LG/MS | 4.16/0.52 | 3.88/0.43 | 4.04/0.49  | 5.21/0.65        | 5.23/0.56  |
| PROCHECK   | 97.6%     | 96.4%     | 97.6%      | 98.7%            | 98.3%      |
| Templates  | 3HKV      | 3HKV      | 2PQF, 3HKV | 3KCZ, 1GS0, 1UK0 | 1UK0, 1A26 |

All these displayed scores indicate the models to be reliable in terms of overall packing. ProQ\_LG: >1.5 fairly good; >2.5 very good; >4 extremely good. ProQ\_MS: >0.1, fairly good; >0.5, very good; >0.8, extremely good. PROCHECK: percentage of residues in the most favored regions or additional allowed regions by Ramachandran plot.

**Supplemental Table 3.** Primers used for PCR, RT-PCR and real-time RT-PCR analysis.

| <b>Experiment</b>             | <b>Name</b>    | <b>Primer sequence (5'-3')</b>        |
|-------------------------------|----------------|---------------------------------------|
| Real time RT-PCR              | Ta-sro1QF      | ATGACCACAAACAAGCCAATAG                |
|                               | Ta-sro1QR      | AAAATCAAAGTCCCAGCACACT                |
|                               | Ta-ActinQF     | GTTCCAATCTATGAGGGATACACGC             |
|                               | Ta-ActinQR     | GAACCTCCACTGAGAACAACATTAC             |
|                               | At-TublinQF    | CTCAAGAGGTTCTCAGCAGTA                 |
|                               | At-TublinQR    | TCACCTTCTTCATCCGCAGTT                 |
|                               | At-NDB2QF      | GAAACTGGAACCAAGAAGAAGAAG              |
|                               | At-NDB2QR      | AGGTAGTAAAGGAGTGAAAGCAAA              |
|                               | At-AOX1AQF     | TTGAGGAAGCAGAGAATGAGAGAA              |
|                               | At-AOX1AQR     | CCAAGGAAATAAGCGTTGAAGAAG              |
| Subcellular localization      | Ta-sro1LF      | GGATCCATGGAAAGGAAGACTGGAATG           |
|                               | Ta-sro1LR      | AAGCTTGGAGGTGCTGCTCCCTC               |
| Protein expression            | Ta-sro1PF      | GGATCCATGGAAAGGAAGACTGGA              |
|                               | Ta-sro1PR      | GCGGCCGCTCA GGA GGT GCT GCT CCC       |
| Overexpression in Arabidopsis | Ta-sro1AOE-F   | TCTAGAATGGAAAGGAAGACTGGA              |
|                               | Ta-sro1AOE-R   | GGATCCTCAGGAGGTGCTGCTCCC              |
| Overexpression in wheat       | Ta-sro1WOE-F   | GGATCCATGGAAAGGAAGACTGGA              |
|                               | Ta-sro1WOE-R   | GAGCTCTCAGGAGGTGCTGCTCCC              |
| RNAi in wheat                 | Ta-sro1Ri-F    | AAGGATCCGAGCTCCAGCAGAAAGTGTAATCAAGGAC |
|                               | Ta-sro1Ri-R    | AAGGTACCACTAGTCTCCCCGAGCTGTTATCTCC    |
| RT-PCR                        | At-ATM-RT-F    | AAGCAACTTGCGAAATCTGGC                 |
|                               | At-ATM-RT-R    | TTACATCCAAGCTCCCCAGC                  |
|                               | At-RbohF-RT-F  | CAGCAACCGCCATTAATG                    |
|                               | At-RbohF-RT-R  | CATCGAACAGTTCCAATGC                   |
|                               | Ta-sro1-RT-F   | ATGACCACAAACAAGCCAATAG                |
|                               | Ta-sro1-RT-R   | GTAACCTCCAGAACACCACGCA                |
|                               | At-Tublin-RT-F | CTCAAGAGGTTCTCAGCAGTA                 |
|                               | At-Tublin-RT-R | TCACCTTCTTCATCCGCAGTT                 |
